# Supplementary material
Source: publisher site journal article supplement (https://www.dovepress.com/article/487493)
Supplement: Supplementary file 1 [file get_supplementary_file.php]

Table S1. Knowledge dimension of the participants.

|  | **a. very knowledgeable** | **b. heard of it** | **c. not clear** |
| --- | --- | --- | --- |
| **K1. Diabetes is classified into four types: type 1 diabetes, type 2 diabetes, special type diabetes, and gestational diabetes.** | **240(48.7)** | 221(44.8) | 32(6.5) |
| **K2. Fasting blood glucose, random blood glucose, or a 2-hour blood glucose test after oral glucose intake are the main diagnostic criteria for diabetes.** | **252(51.1)** | 205(41.6) | 36(7.3) |
| **K3. For most type 2 diabetes patients, the ideal fasting blood glucose control range is 4.4-7.0 mmol/L.** | **268(54.4)** | 184(37.3) | 41(8.3) |
| **K4. Continuous Glucose Monitoring (CGM) system refers to the technology that continuously monitors the subcutaneous interstitial fluid glucose concentration through a glucose sensor.** | 216(43.8) | **225(45.6)** | 52(10.5) |
| **K5. CGM includes fasting blood glucose, pre-meal blood glucose, postprandial 2-hour blood glucose, random blood glucose, bedtime, or overnight blood glucose. The CGM system provides continuous, comprehensive, and reliable information on blood glucose throughout the day, allowing an understanding of the trend and characteristics of blood glucose fluctuations.** | **220(44.6)** | 218(44.2) | 55(11.2) |
| **K6. CGM systems can be categorized into retrospective CGM, real-time CGM, and intermittently scanned CGM based on their technology and usage characteristics.** | 204(41.4) | **218(44.2)** | 71(14.4) |
| **K7. Retrospective CGM cannot display the wearer's glucose levels in real-time; the relevant data need to be downloaded after monitoring, making it also known as blind CGM.** | 192(38.9) | **212(43.0)** | 89(18.1) |
| **K8. Real-time CGM provides immediate blood glucose information, high or low blood glucose alerts, and displays glucose trend changes, thus serving as an early warning system. Real-time CGM is particularly suitable for patients with significant blood glucose fluctuations and a high risk of hypoglycemia, especially those with repeated nocturnal hypoglycemia or asymptomatic hypoglycemia.** | 187(37.9) | **229(46.5)** | 77(15.6) |
| **K9. Flash Glucose Monitoring (FGM) is a type of on-demand CGM, where the wearer actively scans the sensor to obtain current glucose data. It does not require fingerstick calibration, eliminating the pain of frequent blood sampling.** | 178(36.1) | **231(46.9)** | 84(17.0) |
| **K10. CGM can detect hidden hyperglycemia and hypoglycemia that may not be easily detected by traditional monitoring methods.** | 202(41.0) | **215(43.6)** | 76(15.4) |
| **K11. Time in Range (TIR) refers to the time or percentage within the target glucose range (usually 3.9-10.0 mmol/L) over a 24-hour period.** | 204(41.4) | **225(45.6)** | 64(13.0) |
| **K12. TIR is significantly associated with microvascular complications and cardiovascular diseases in diabetes patients, making it a novel indicator for evaluating blood glucose control levels.** | 197(40.0) | **217(44.0)** | 79(16.0) |
| **K13. Currently, CGM systems provide the most accurate and reliable assessment of TIR.** | 193(39.1) | **209(42.4)** | 91(18.5) |
| **K14. Standardized CGM reports include 14 parameters as core indicators, contributing significantly to the clinical assessment of blood glucose control.** | 185(37.5) | **210(42.6)** | 98(19.9) |

Bold: Indicates the option with the highest response volume

Table S2. Attitude dimension of the participants.

|  | **a. strongly agree** | **b. agree** | **c. neutral** | **d. disagree** | **e. strongly disagree** |
| --- | --- | --- | --- | --- | --- |
| **A1. Monitoring blood glucose at home is a crucial component of self-management for individuals with diabetes.** | **241(48.9)** | 203(41.2) | 29(5.9) | 14(2.8) | 6(1.2) |
| **A2. Effective blood glucose monitoring can reduce the risk of diabetes complications.** | **253(51.3)** | 189(38.3) | 37(7.5) | 10(2.0) | 4(0.8) |
| **A3. Efficient blood glucose monitoring can prevent risks associated with low or high blood sugar, such as acute cardiovascular diseases or accidental injuries.** | **230(46.7)** | 206(41.8) | 39(7.9) | 15(3.0) | 3(0.6) |
| **A4. Blood glucose monitoring can assist doctors in accurately understanding my medical condition.** | **236(47.9)** | 198(40.2) | 33(6.7) | 16(3.2) | 10(2.0) |
| **A5. Blood glucose monitoring serves as a significant basis for adjusting diet, exercise, and medication treatments for individuals with diabetes.** | **244(49.5)** | 195(39.6) | 34(6.9) | 13(2.6) | 7(1.4) |
| **A6. Compared to traditional monitoring methods, Continuous Glucose Monitoring (CGM) systems are more helpful for patients in understanding their blood glucose patterns.** | **223(45.2)** | 207(42.0) | 45(9.1) | 15(3.0) | 3(0.6) |
| **A7. The extensive data generated by CGM systems greatly facilitate a comprehensive assessment of the quality of blood glucose control in individuals with diabetes.** | **215(43.6)** | 206(41.8) | 51(10.3) | 15(3.0) | 6(1.2) |
| **A8. Effective data from CGM systems, when compared to traditional monitoring methods, can be utilized to better guide treatment plans.** | **209(42.4)** | **209(42.4)** | 58(11.8) | 14(2.8) | 3(0.6) |
| **A9. I am willing to use a Continuous Glucose Monitoring (CGM) system. (Open-ended question without assigned scores.)** | **215(43.6)** | 205(41.6) | 47(9.5) | 19(3.9) | 7(1.4) |

Bold: Indicates the option with the highest response volume

Table S3. Practice dimension of the participants.

|  | **a. always** | **b. often** | **c.sometimes** | **d. occasionally** | **e. never** |
| --- | --- | --- | --- | --- | --- |
| **P1. I can monitor my blood glucose according to the frequency recommended by the doctor.** | 184(37.3) | **193(39.1)** | 79(16.0) | 35(7.1) | 2(0.4) |
| **P2. During blood glucose monitoring, I will diligently record events such as diet, exercise, and treatment.** | 171(34.7) | **177(35.9)** | 84(17.0) | 53(10.8) | 8(1.6) |
| **P3. I will analyze blood glucose monitoring results to identify the causes of blood glucose fluctuations.** | **171(34.7)** | 159(32.3) | 89(18.1) | 66(13.4) | 8(1.6) |
| **P4. I will adjust my diet or exercise based on the results of blood glucose monitoring.** | 166(33.7) | **178(36.1)** | 76(15.4) | 66(13.4) | 7(1.4) |
| **P5. I will assist the doctor in adjusting the antidiabetic treatment plan based on the results of blood glucose monitoring.** | **192(38.9)** | 175(35.5) | 68(13.8) | 52(10.5) | 6(1.2) |

Bold: Indicates the option with the highest response volume

Table S4 The Fit Indices of the Structural Equation Model (SEM) Before and After Model Adjustment.

| **Indicator** | **Ideal standard** | **Acceptable standard** | **Before adjustment model (model 1)** | **Adjusted model (model 2)** |
| --- | --- | --- | --- | --- |
| **CMIN/DF value** | ＜3 | ＜5 | 3.356 | 2.164 |
| **RMSEA value** | ＜0.05 | ＜0.07 | 0.069 | 0.049 |
| **GFI value** | ＞0.9 | ＞0.8 | 0.852 | 0.911 |
| **AGFI value** | ＞0.9 | ＞0.8 | 0.825 | 0.889 |
